# Supplementary material for: Progesterone-mediated effects on gene expression and oocyte-cumulus complex transport in the mouse fallopian tube
Source: PubMed Central journal article supplement (PMC4450483; doi:10.1186/s12958-015-0038-8), 2015-05-13
Supplement: 12958_2015_38_MOESM1_ESM.pdf [file 12958_2015_38_MOESM1_ESM.pdf]

**Supplemented table 1.**

| <b><i>Gene name</i></b> | <b>Taqman assay-id</b> |
|-------------------------|------------------------|
| <i>Amigo2</i>           | 00662105_s1            |
| <i>Rasd1</i>            | 00842185_g1            |
| <i>Arfl4</i>            | 03031495_u1            |
| <i>Edn1</i>             | 00438656_m1            |
| <i>Edn2</i>             | 00432983_m1            |
| <i>Edn3</i>             | 00432986_m1            |
| <i>EdnrA</i>            | 01243722_m1            |
| <i>EdnrB</i>            | 00432989_m1            |
| <i>Pgr</i>              | 00435628_m1            |
| <i>Hprt</i>             | 01545399_m1            |
| <i>Rpl19</i>            | 02601633_g1            |

Taqman assay-id for primers and probes used for quantitative PCR analysis.
